# Supplementary material
Source: PubMed Central journal article supplement (PMC5929989)
Supplement: NIHMS902312-supplement-1.pdf [file NIHMS902312-supplement-1.pdf]

## Supplemental Data

Table 1: qRT-PCR Primers for mRNA and Chromatin Immunoprecipitation

| Gene                  | Forward primer (5' → 3')    | Reverse Primer (5' → 3') |
|-----------------------|-----------------------------|--------------------------|
| <i>lfi205</i>         | GTATGAGTGAAGAAAAGACTGAC     | GGATATTGGTGACTGGCATG     |
| <i>lfi205</i>         | AAGATCAAGGCATCTGGGAAAG      | CCTCTGGGAATGTTCTGGTTC    |
| <i>lfi204</i>         | GACAACCAAGAGCAATACACCA      | ATCAGTTTGCCCAATCAGAAT    |
| <i>Mnda</i>           | TGTGAAGAACCCACAGCCAT        | TGATTTTTGGTTCTTAGCCGAAA  |
| <i>Gapdh</i>          | ATTGTCAGCAATGCATCCTG        | ATGGACTGTGGTCATGAGCC     |
| <i>Hprt</i>           | TGAAGAGCTACTGTAATGATCAGTCAA | AGCAAGCTTGCAACCTTAACCA   |
| $\beta$ -actin        | TTGAACATGGCATTGTTACCAA      | TGGCATAGAGGTCTTTACGGA    |
| ASC (3'UTR)           | CCAAACATGCACAAATCAGTC       | AAATGGGGAGCCAGGAATCA     |
| ASC int2-ex3          | CACCCTTGACAGCCTATCT         | CTCCGTCCACTTCTGTGACC     |
| ASC ex2/3-ex3         | CAGCCAGAACAGGACACTTT        | CTCCGTCCACTTCTGTGACC     |
| ASC ex1-ex1/2         | CTGCGAGAAGGCTATGGG          | CTCCAGACTCTTCTTTAGT      |
| ASC ex1-in1           | CTGCGAGAAGGCTATGGG          | GAACAAGGGGACACACT        |
| <i>Asc</i> upstream   | TCAGCCTAGCCAAAAGCCA         | GACTCCCCACCCTCTTTTC      |
| <i>Asc</i> TSS 1      | CACGAGATGCCATCCTGGAC        | CCCATAGCCTTCTCGCAGTT     |
| <i>Asc</i> TSS 2      | CTGCAGATGGACGCCATAGA        | TGTGAGCTCCAAGCCATACG     |
| <i>Asc</i> downstream | CACTCATTGCCAGGGTCACAG       | CCTGGAGGAGGGAGTCCTTG     |
| <i>Gapdh</i> TSS      | TGAAGGTCGGTGTGAACGG         | CAATCTCCACTTTGCCACTGC    |
